# Supplementary material
Source: PubMed Central journal article supplement (PMC7557300)
Supplement: mmc1.pdf [file mmc1.pdf]

# THE LANCET

## Supplementary appendix

This appendix formed part of the original submission. We post it as supplied by the authors.

**This online publication has been corrected. The corrected version first appeared at [thelancet.com](http://thelancet.com) on October 19, 2020.**

Supplement to: Alwan NA, Burgess RA, Ashworth S, et al. Scientific consensus on the COVID-19 pandemic: we need to act now. *Lancet* 2020; published online Oct 14. [http://dx.doi.org/10.1016/S0140-6736\(20\)32153-X](http://dx.doi.org/10.1016/S0140-6736(20)32153-X).

## Signatories

Kristina Alexanderson, Stockholm, Sweden  
Christian L. Althaus, University of Bern, Switzerland  
Nisreen Alwan, University of Southampton, UK  
Rochelle Ann Burgess, University College London, UK  
Simon Ashworth, Imperial College Healthcare NHS Trust, UK  
Rupert Beale, Francis Crick Institute, UK  
Laura Bear, London School of Economics, UK  
Nahid Bhadelia, Boston University School of Medicine, US  
Debby Bogaert, University of Edinburgh, UK  
Reinhard Busse, Technische Universität Berlin, Germany  
Colin J. Carlson, Georgetown University, US  
Yves Charpak, Fondation Charpak, l'esprit des sciences, France  
Tim Colbourn, University College London, UK  
Anthony Costello, IndieSAGE, UK  
Jennifer Dowd, University of Oxford, UK  
John Drury, University of Sussex, UK  
Isabella Eckerle, Geneva Centre for Emerging Viral Diseases, Switzerland  
Jacques Fellay, EPFL and Lausanne University Hospital, Switzerland  
David Fisman, University of Toronto, Canada  
Karl Friston, University College London, UK  
Valentina Gallo, University of Groningen, The Netherlands  
Lynn R Goldman, George Washington University, USA  
Trisha Greenhalgh, University of Oxford, UK  
Deepti Gurdasani, Queen Mary University of London, UK  
Adam Hamdy, Ligandal, US  
William Hanage, Harvard T. H Chan School of Public Health, US  
Emma Hodcroft, Biozentrum, University of Basel, Switzerland  
David Hunter, University of Oxford, UK  
Zoë Hyde, The University of Western Australia, Australia  
David Ingleby, University of Amsterdam, The Netherlands  
Paul Kellam, Imperial College London, UK  
Michelle Kelly-Irving, Inserm, France  
Kamlesh Khunti, University of Leicester and IndieSAGE, UK  
Ilona Kickbusch, Graduate Institute of International and Development Studies, Switzerland  
David King, IndieSAGE, UK  
Florian Krammer, Icahn School of Medicine at Mount Sinai, US  
Krutika Kuppalli M.D., Medical University of South Carolina, US  
Alastair H Leyland, University of Glasgow, UK  
Marc Lipsitch, Harvard T.H. Chan School of Public Health, USA  
Maimuna S. Majumder, Boston Children's Hospital and Harvard Medical School, US  
Jose M Martin-Moreno, University of Valencia, Valencia, Spain  
Martin McKee, LSHTM, and IndieSAGE, UK  
Paul McLaren, University of Manitoba, Canada  
Alan McNally, University of Birmingham, UK  
Michael Mina, Harvard T.H. Chan School of Public Health, USA  
Julian Mamo, Chronic Diseases Section European Public Health Association  
Susan Michie, University College London and IndieSAGE, UK  
Melinda Mills, University of Oxford and Royal Society SET-C, UK  
Jacob Moran-Gilad, Ben Gurion University, Israel

Elias Mossialos, London School of Economics, UK  
Stuart Neil, King's College London, UK  
Ali Nouri, Federation of American Scientists, US  
Anna Odone, University of Pavia, Italy  
Christina Pagel, University College London and IndieSAGE, UK  
Alexandra Phelan, Georgetown University, US  
Deenan Pillay, University College London and IndieSAGE, UK  
Dominic Pimenta, Healthcare Workers Foundation (HEROES), UK  
Saskia Popescu, George Mason University, US  
Viola Priesemann, Max Planck Institute for Dynamics and Self-Organization, Germany  
Seth J. Prins, Columbia University Departments of Epidemiology and Sociomedical Sciences, USA  
Angela L. Rasmussen, Columbia Mailman School of Public Health, US  
Stephen Reicher, University of St. Andrews, UK  
Walter Ricciardi, Università Cattolica del Sacro Cuore, Italy  
Ken Rice, University of Edinburgh, UK  
Johanna Riha, UN University, Kuala Lumpur, Malaysia  
Harry Rutter, University of Bath, UK  
Gabriel Scally, IndieSAGE, UK  
Carlo Signorelli, Università Vita-Salute San Raffaele, Italy  
Joshua Silver, University of Oxford, UK  
Tara Smith, Kent State University College of Public Health, US  
Devi Sridhar, University of Edinburgh, UK  
Anthony Staines, Dublin City University, Ireland  
Charles Swanton, Francis Crick Institute and UCL Cancer Institute, UK  
Rochelle P. Walensky, Massachusetts General Hospital, Harvard Medical School, USA  
Kevin Watkins, Save the Children, UK  
Clare Wenham, London School of Economics and Political Science, UK  
Robert West, University College London, UK  
Gavin Yamey, Professor of Global Health and Public Policy, Duke University, USA  
Kit Yates, University of Bath, and IndieSAGE, UK  
Hisham Ziauddeen, University of Cambridge, UK
